# Supplementary material
Source: PubMed Central journal article supplement (PMC7561527)
Supplement: mmc1.pdf [file mmc1.pdf]

**Supplemental Table 1: Clinical characteristics of the patients hospitalized at Montefiore Medical Center**

|                                                                | <b>Total patients<br/>N = 79</b> | <b>Survivors<br/>N = 51</b> | <b>Non survivors<br/>N = 28</b> | <b>p-<br/>value</b> |
|----------------------------------------------------------------|----------------------------------|-----------------------------|---------------------------------|---------------------|
| <b>Sex</b>                                                     |                                  |                             |                                 |                     |
| Male,%                                                         | 50 (63%)                         | 36 (71%)                    | 14 (50%)                        | 0.069               |
| Female,%                                                       | 29 (37%)                         | 15 (29%)                    | 14 (50%)                        |                     |
| <b>Age, median [IQR]</b>                                       | 61 [51-67]                       | 61 [48-67]                  | 63.5 [56-71.5]                  | 0.073               |
| <b>Race</b>                                                    |                                  |                             |                                 |                     |
| Hispanic                                                       | 43 (54%)                         | 27 (53%)                    | 16 (57%)                        | 0.26                |
| African American                                               | 27 (34%)                         | 20 (39%)                    | 7 (25%)                         |                     |
| Other                                                          | 9 (11%)                          | 4 (8%)                      | 5 (18%)                         |                     |
| <b>Type of transplant</b>                                      |                                  |                             |                                 |                     |
| Deceased donor                                                 | 61 (77%)                         | 38 (75%)                    | 23 (82%)                        | 0.44                |
| Living donor                                                   | 18 (23%)                         | 13 (26%)                    | 5 (18%)                         |                     |
| <b>Time after<br/>transplantation, median<br/>[IQR] months</b> | 58.2 [25.4-<br>127.6]            | 57.7 [27.3-<br>123.7]       | 65.2 [16.3-<br>134.1]           | 0.22                |
| <b>Transplant &lt; 6 months</b>                                | 6 (8%)                           | 5 (10%)                     | 1 (4%)                          | 0.32                |
| <b>Transplant &lt; 12 months</b>                               | 9 (11%)                          | 8 (16%)                     | 1 (4%)                          | 0.22                |
| <b>Immunosuppressive<br/>regimen</b>                           |                                  |                             |                                 |                     |
| Calcineurin inhibitors<br>(Tacrolimus/Cylosporin)              | 74 (71/3<br>(94%))               | 49 (48/1<br>(96%))          | 25 (23/2<br>(89%))              | 0.34                |
| MMF/MPA                                                        | 70 (89%)                         | 45 (88%)                    | (89%)                           | 0.89                |
| Corticosteroid                                                 | 75(95%)                          | 50 (98%)                    | 25 (89%)                        | 0.12                |
| Sirolimus                                                      | 7 (3%)                           | 5 (4%)                      | 2 (3%)                          | 0.28                |
| <b>Etiology of ESRD</b>                                        |                                  |                             |                                 |                     |
| Diabetes mellitus                                              | 42 (53%)                         | 25 (49%)                    | 17 (61%)                        | 0.66                |
| Hypertension                                                   | 13 (17%)                         | 10 (20%)                    | 3 (11%)                         |                     |
| Glomerulonephritis                                             | 15 (19%)                         | 9 (18%)                     | 6 (21%)                         |                     |
| Polycystic kidney disease                                      | 3 (4%)                           | 2 (4%)                      | 1 (4%)                          |                     |
| Others                                                         | 6 (8%)                           | 5 (10%)                     | 1 (4%)                          |                     |

|                                                                                                   |                  |                  |                   |       |
|---------------------------------------------------------------------------------------------------|------------------|------------------|-------------------|-------|
| <b>Body Mass Index (kg/m2) median [IQR]</b>                                                       | 28.1 [23.7-32.3] | 26.7 [23.1-31.4] | 30.4 [25.7-34.7]  | 0.057 |
| <b>History of smoking</b>                                                                         | 28 (35%)         | 18 (35%)         | 10 (36%)          | 0.97  |
| <b>Influenza vaccination</b>                                                                      | 59 (83%)         | 43 (88%)         | 16 (73%)          | 0.12  |
| <b>Comorbidities</b>                                                                              |                  |                  |                   |       |
| Hypertension                                                                                      | 77 (98%)         | 49 (96%)         | 28 (100%)         | 0.54  |
| Diabetes mellitus                                                                                 | 53 (67%)         | 32 (63%)         | 21 (75%)          | 0.27  |
| Heart disease                                                                                     | 15 (19%)         | 10 (20%)         | 5 (18%)           | 0.85  |
| Lung disease                                                                                      | 9 (11%)          | 4 (8%)           | 5 (18%)           | 0.18  |
| Cancer                                                                                            | 9 (11%)          | 5 (10%)          | 4 (14%)           | 0.55  |
| <b>Blood type</b>                                                                                 |                  |                  |                   |       |
| A                                                                                                 | 28 (36%)         | 15 (30%)         | 13 (46%)          | 0.19  |
| B                                                                                                 | 16 (21%)         | 13 (26%)         | 3 (11%)           |       |
| AB                                                                                                | 3 (4%)           | 1 (2%)           | 2 (7%)            |       |
| O                                                                                                 | 31 (40%)         | 21 (42%)         | 10 (36%)          |       |
| <b>Angiotensin converting enzyme inhibitor or angiotensin receptor blocker prior to admission</b> | 19 (24%)         | 12 (24%)         | 7 (25%)           | 0.88  |
| <b>Statin prior to admission</b>                                                                  | 49 (62%)         | 31 (61%)         | 18 (64%)          | 0.76  |
| <b>Baseline creatinine, median [IQR]</b>                                                          | 1.4 [1.2-2.0]    | 1.4 [1.1-2.0]    | 1.5 [1.2-2.0]     | 0.86  |
| <b>Symptoms on admission</b>                                                                      |                  |                  |                   |       |
| Fever                                                                                             | 46 (58%)         | 31 (61%)         | 15 (54%)          | 0.53  |
| Dyspnea                                                                                           | 46 (58%)         | 26 (51%)         | 20 (71%)          | 0.078 |
| Myalgias                                                                                          | 32 (41%)         | 17 (33%)         | 15 (54%)          | 0.08  |
| Cough                                                                                             | 46 (58%)         | 31 (61%)         | 15 (54%)          | 0.53  |
| Diarrhea                                                                                          | 28 (35%)         | 18 (35%)         | 10 (36%)          | 0.97  |
| <b>Pulse oximetry on admission (%)</b>                                                            | 95 [92-98]       | 96 [94-98]       | 93 [89-96.5]      | 0.037 |
| <b>Temperature on admission (F)</b>                                                               | 99 [98.3-100.5]  | 99 [98.4-100.1]  | 99.1 [98.3-100.9] | 0.87  |
